# Supplementary material for: A Liquid Chromatography with Tandem Mass Spectrometry-Based Proteomic Analysis of Primary Cultured Cells and Subcultured Cells Using Mouse Adipose-Derived Mesenchymal Stem Cells
Source: Hindawi journal article supplement (doi:10.1155/2019/7274057), 2019-01-10

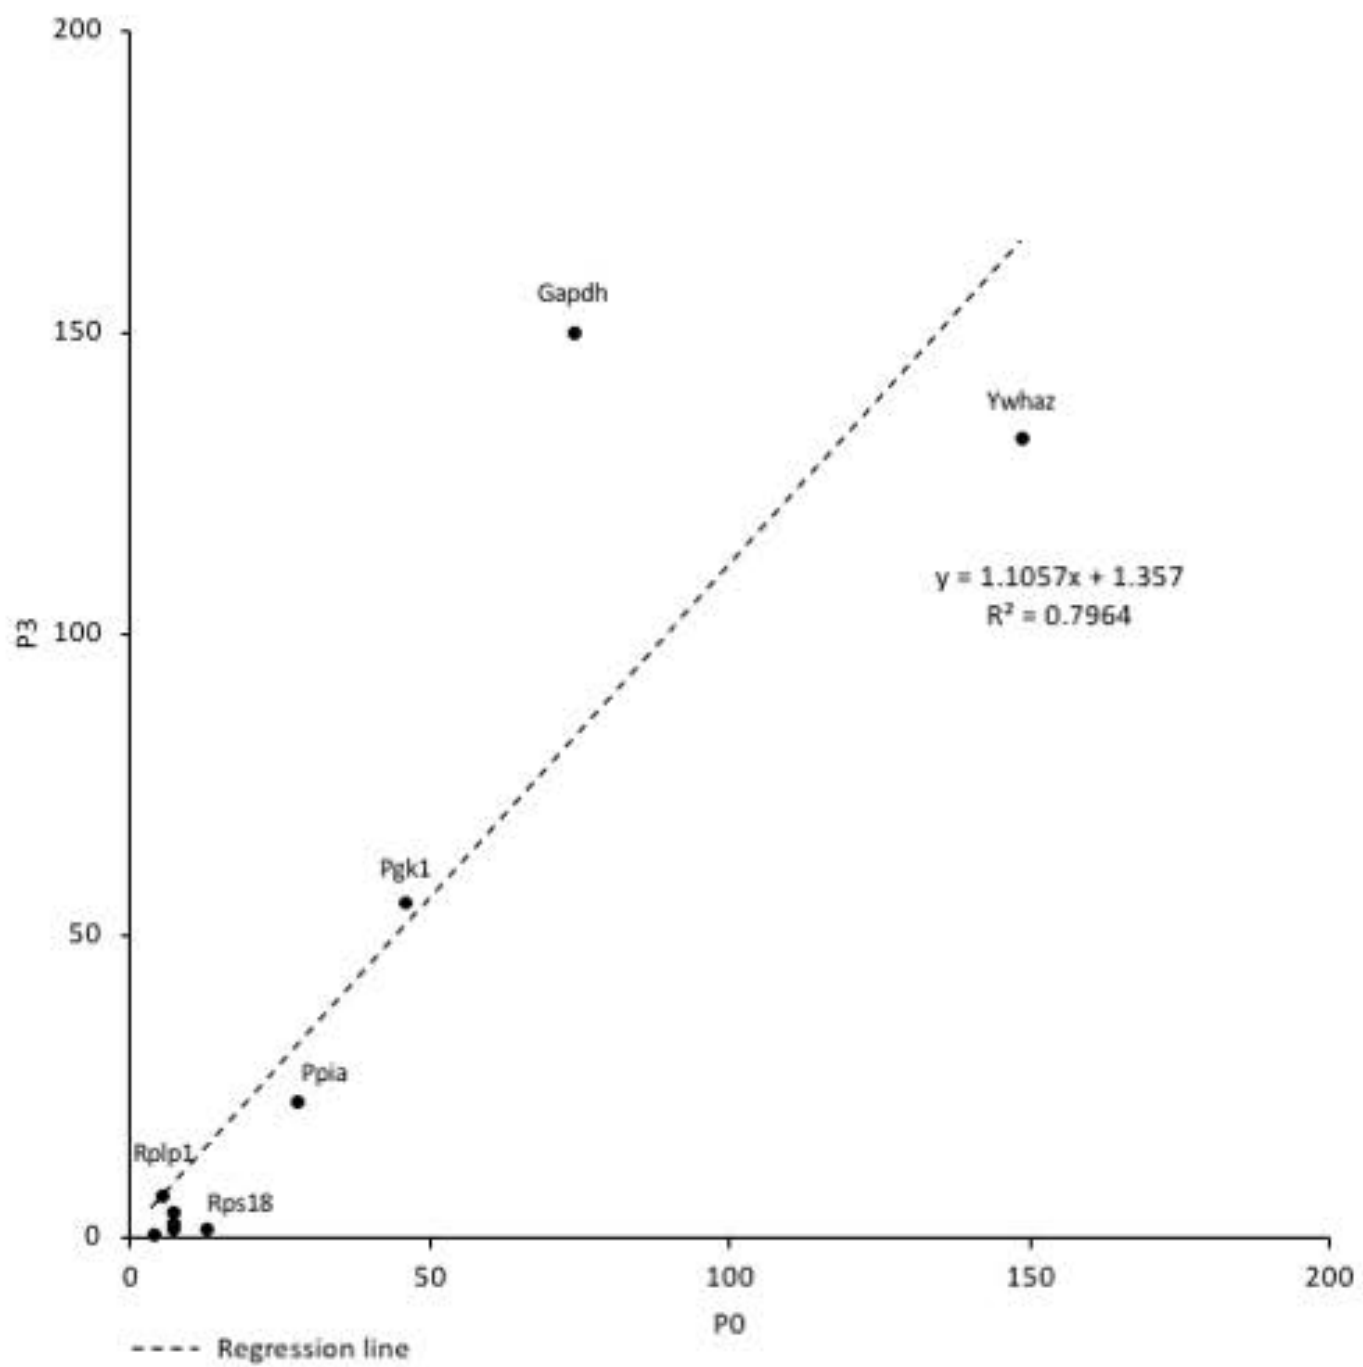

Supplement: f1 [file 7274057.f1.pdf]
